# Supplementary material for: A pivotal role for Interferon-α receptor-1 in neuronal injury induced by HIV-1
Source: PubMed Central journal article supplement (PMC7388458; doi:10.1186/s12974-020-01894-2), 2020-07-29

### A. Cortex

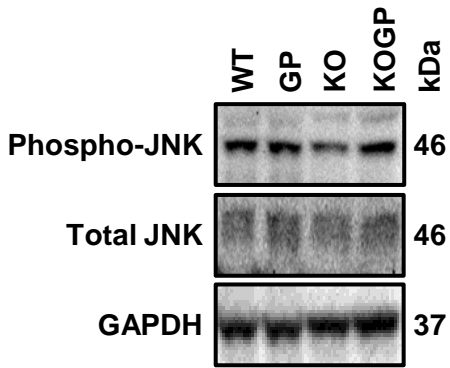

### C. Hippocampus

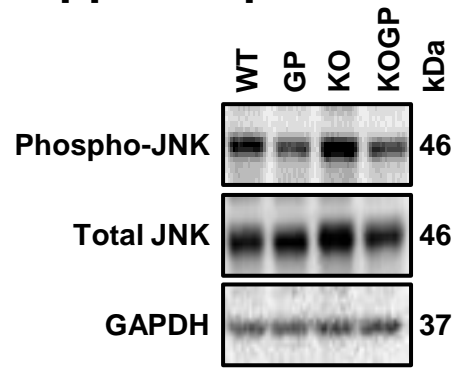

### B.

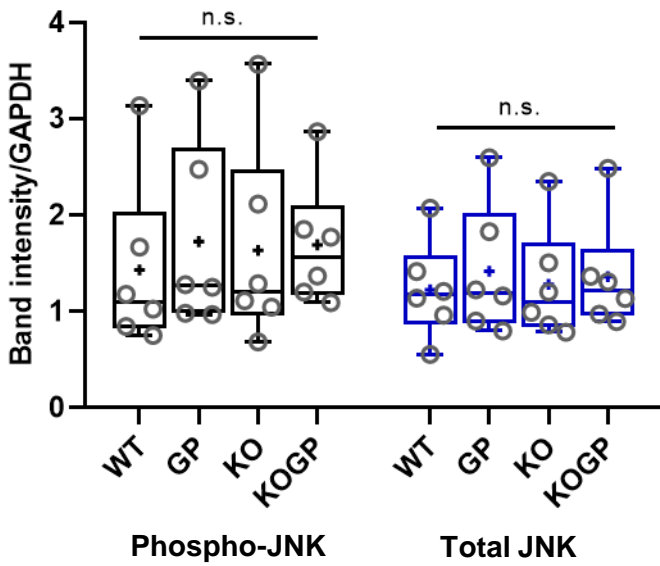

### D.

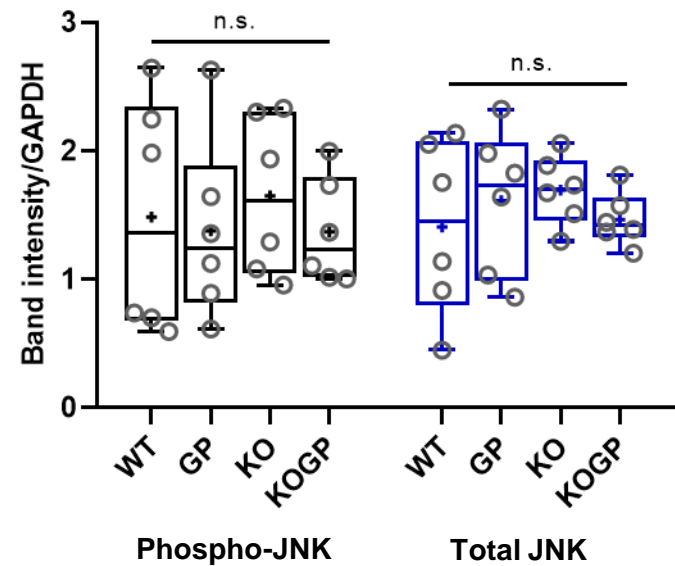

Supplement: 12974_2020_1894_MOESM2_ESM.pdf [file 12974_2020_1894_MOESM2_ESM.pdf]
